# Supplementary material for: Global gene expression analysis using RNA-seq uncovered a new role for SR1/CAMTA3 transcription factor in salt stress
Source: PubMed Central journal article supplement (PMC4890006; doi:10.1038/srep27021), 2016-06-02
Supplement: srep27021-s1.pdf [file srep27021-s1.pdf]

## Supplementary Tables and Figures

### **Global gene expression analysis using RNA-seq uncovered a new role for SR1/CAMTA3 transcription factor in salt stress**

Kasavajhala V.S.K. Prasad<sup>1</sup>, Amira A.E. Abdel-Hameed<sup>1</sup>, Denghui Xing, and Anireddy S.N. Reddy\*

Department of Biology and Program in Molecular Plant Biology, Colorado State University, Fort Collins, CO, 80523

<sup>1</sup>These authors contributed equally

**Supplementary Table S1: Mapping statistics of RNA-seq reads**

---

| <b>Sample</b> | <b>Total Reads</b> | <b>Reads mapped</b> | <b>Percent Mapped</b> | <b>Uniquely Mapped</b> | <b>Percent Uniquely Mapped</b> | <b>Multiple Hits</b> |
|---------------|--------------------|---------------------|-----------------------|------------------------|--------------------------------|----------------------|
| WTSR1_R1      | 37857222           | 35886091            | 94.8                  | 32436144               | 90.4                           | 3449947              |
| WTSR1_R2      | 43257556           | 40792316            | 94.3                  | 37269214               | 91.4                           | 3523102              |
| KOSR1_R1      | 45443405           | 42610742            | 93.8                  | 39268747               | 92.2                           | 3341995              |
| KOSR1_R2      | 41943988           | 39615994            | 94.4                  | 36355172               | 91.8                           | 3260822              |
| SR1YFP_R1     | 42479202           | 39987615            | 94.1                  | 36689779               | 91.8                           | 3297836              |
| SR1YFP_R2     | 37006004           | 35056382            | 94.7                  | 32469773               | 92.6                           | 2586609              |

---

**Supplementary Table S2.** SR1 binding motifs in other *SRs* promoters

---

| Promoter           | Motif         | Location     |
|--------------------|---------------|--------------|
| SR1/ <i>CAMTA3</i> | <u>ACGTGA</u> | -365         |
|                    | <u>TCGTGT</u> | -967         |
| SR2/ <i>CAMTA1</i> | -----         | -----        |
| SR3/ <i>CAMTA6</i> | <u>CCGCGG</u> | -748         |
|                    | <u>CCGCGA</u> | -1348        |
| SR4/ <i>CAMTA2</i> | <u>ACGCGC</u> | -616         |
|                    | <u>CCGCGG</u> | -1951        |
|                    | <u>ACGTGT</u> | -302, -310   |
|                    | <u>ACGTGG</u> | -593         |
|                    | <u>ACGTGA</u> | -479         |
| SR5/ <i>CAMTA4</i> | <u>CCGCGG</u> | -1872        |
|                    | <u>ACGTGG</u> | -35          |
|                    | <u>ACGTGC</u> | -208         |
| SR6/ <i>CAMTA5</i> | <u>CCGCGG</u> | -1054, -1197 |
|                    | <u>ACGCGG</u> | -541         |
|                    | <u>ACGTGT</u> | -3391        |

---

Motif highlighted is consensus-binding motif of SR1. The motifs that are not highlighted contain a part of consensus motif.

Supplementary Table S3. Primers used in the current study.

| S.No. | Name            | Sequence                                             |
|-------|-----------------|------------------------------------------------------|
| 1     | AtSR1-FW        | CCA TTT AAA TAT GGC GGA AGC<br>AAG ACG ATT CAG CCC A |
| 2     | AtSR1-RW        | CGCGGATCCTTAACTGGTCCACAAAG<br>ATGAGGACATA            |
| 3     | Q-SR1-FW        | CTCGGGAGGAGACTGAAATTG                                |
| 4     | Q-SR1-RW        | AGGAGCAACACATTGGAGAATA                               |
| 5     | Q-SR2-FW        | GGG TAT GAC TGG GCC ATT AAA                          |
| 6     | Q-SR2-RW        | TTT CCT CCC TGC CAC TAA AC                           |
| 7     | Q-SR3-FW        | CTC TGT GCC AGT CTT GGA TAC                          |
| 8     | Q-SR3-RW        | GAG CAG TCC ACC CTT GTT TAT                          |
| 9     | Q-SR4-FW        | CCA ATC TTA GCA GCA GGA GTT A                        |
| 10    | Q-SR4-RW        | GAC AAG TAC AGC GAC AGT ATC C                        |
| 11    | Q-SR5-FW        | TGG ATT GCA GGA AGA CTC AAA                          |
| 12    | Q-SR5-RW        | GGA GCT ACC AGT GCA GAA TAA G                        |
| 13    | Q-SR6-FW        | GGG ACC ATC TCT TTG AGC TTA C                        |
| 14    | Q-SR6-RW        | CTC CAA GCC CTT TAG AGT CAT ATT                      |
| 15    | AT5G45890-FW    | ATGAGGATGTCCCGGTTAATG                                |
| 16    | AT5G45890-RW    | GTGAACACACCAGACGAATAGA                               |
| 17    | AT2G41850-FW    | CCGGTACAGACAATGGAGTAAG                               |
| 18    | AT2G41850-RW    | TTGCTCTTGTCGCAGTAGTC                                 |
| 19    | AT3G01420-FW    | ACGTCGACTTAGCTGCTTTAG                                |
| 20    | AT3G01420-RW    | CTCCGTTAGATCTTCCCCTTG                                |
| 21    | AT3G60140-FW    | GACAACGACGACGGTACAAA                                 |
| 22    | AT3G60140-RW    | CTCTTACGTCACACCCATCTTC                               |
| 23    | AT2G45220-FW    | GAAGATCCGACCCGAATCAAA                                |
| 24    | AT2G45220-RW    | GTCTCCAAGGTCTACCCAAATAAG                             |
| 25    | AT5G38710-FW    | GCCTCAAATCCGTGTGTCTTAG                               |
| 26    | AT5G38710-RW    | CCGACCAATACGCCATGTAATC                               |
| 27    | AT2G42540-FW    | CTCAGTTCGTCGTCGTTTCT                                 |
| 28    | AT2G42540-RW    | GTTGAGGTCATCGAGGATGTT                                |
| 29    | AT5G15960-FW    | GCTGAGGAGAAGAGCAATGT                                 |
| 30    | AT5G15960-RW    | CCGCATCCGATACACTCTTT                                 |
| 31    | AT1G14250-FW    | CAGTCACAGTTTCTCTGACTT                                |
| 32    | AT1G14250-RW    | GGGTCTTCAACTATTCCATCCC                               |
| 33    | NDR1-CHIP-FW**  | TTGGTTCTTTTTGATAACCCAAAGT                            |
| 34    | NDR1-CHIP-RW**  | TTTGGTTTGCTGATTGGTTGATATT                            |
| 35    | EDS1-CHIP-FW**  | TGGTTATGCAATTTGGTTTAGCCAA                            |
| 36    | EDS1-CHIP-RW**  | ACCGAATTAACATACTACACCTTCTT                           |
| 37    | ACTIN2CHIP-FW** | GATCCTAGTCTTTTAGTGTGCATTC                            |
| 38    | ACTIN2CHIP-RW** | ATTAAATGATTGATCGGTTTTTCGTG                           |
| 39    | ATKT11-CHIP FW  | TTGTAATTTGTCAGGAACGGAGA                              |
| 40    | ATKT11-CHIP RW  | GTGTCCTGACGTGTGGATT                                  |
| 41    | MDAHAR-CHIP FW  | TCACGAACGTTATCCCCTAAA                                |
| 42    | MDAHAR-CHIP RW  | CATTGGCATTATCACTCGAATCT                              |
| 43    | HSP90-7-CHIP-FW | TCTCTGGTGAGGAAGGAAGT                                 |
| 44    | HSP90-7-CHIP-RW | CACTCATCCGTAGTAGCAATATGT                             |

|    |                       |                            |
|----|-----------------------|----------------------------|
| 45 | GST1-CHIP FW          | TGATCTAACTCGAGCATCCAAC     |
| 46 | GST1-CHIP RW          | CCACAAGAATAGTCCTTCATCTACTA |
| 47 | Glycos transf-CHIP FW | ATACGGCTGCTCTTGTTAAGT      |
| 48 | Glycos transf-CHIP RW | CCACTCATGAATTGGTTACTGATTT  |
| 49 | GLP9-CHIP FW          | AAGTAGTAACAGCCTCTCTCTTTC   |
| 50 | GLP9-CHIP RW          | TTGGGTTGCTTGATTTCGTTAAG    |
| 51 | MYB2-CHIP FW          | CGTGATTGCACACAACAAGAAG     |
| 52 | MYB2-CHIP RW          | CACACAGTATCGCAGACGTAAG     |
| 53 | AT1G15790 FW          | TGTTCCAAATCTTGGGCTACAA     |
| 54 | AT1G15790 RW          | CCTCTTCCACAGTCAACAACCTC    |
| 55 | AT1G07530 FW          | GGA CCT TACTGGCTTCGTTATG   |
| 56 | AT1G07530 RW          | GGGAGAGATGGTTTGGACTTTG     |
| 57 | ACTIN2 FW             | GGCAAGTCATCACGATTGG        |
| 58 | ACTIN2 RW             | CAGCTTCCATTCCCACAAAC       |
| 59 | LBa1                  | TGGTTCACGTAGTGGGCCATCG     |

\*\* Primers are adopted from Nie et al., 2012.

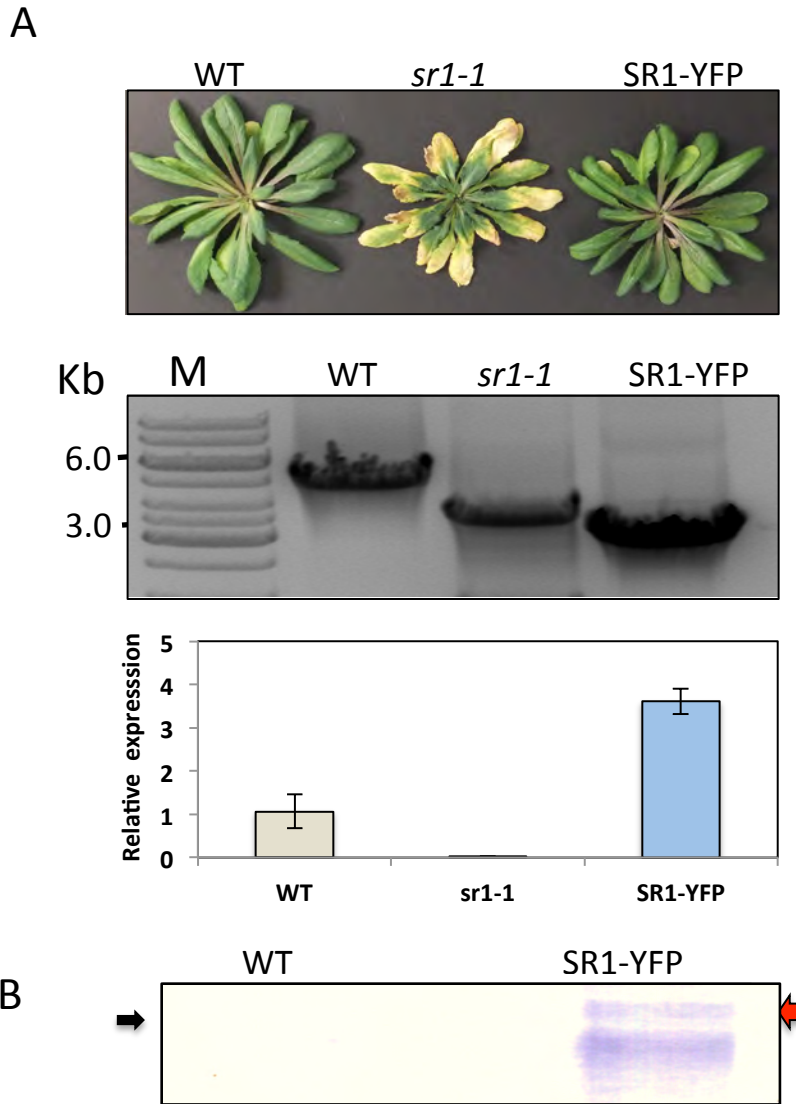

**Supplementary Figure S1. Verification of genotypes used for RNA-seq.** **A)** Top panel: Phenotypes of 40-day-old-plants of wild type (WT), *SR1* mutant (*sr1-1*) and *sr1-1* complemented with *SR1* (SR1-YFP) grown as described in the Methods section. Middle panel: Genomic PCR of the three genotypes. Prior to RNA-seq, genomic PCR was performed with *SR1*-specific primers in case of wild-type and SR1-YFP whereas *SR1*-specific forward primer and *Lba1* reverse primer (T-DNA specific primer) were used for *sr1-1*. In all three cases the expected amplicon size was obtained. Bottom panel: Analysis of *SR1* expression using RT-qPCR in two-week-old seedlings of wild type (WT), *SR1* mutant (*sr1-1*) and complemented line (SR1-YFP). **B)** Immunodetection of SR1-YFP protein in the nuclear extracts of the transgenic line expressing SR1-YFP using anti-GFP antibody.

**A**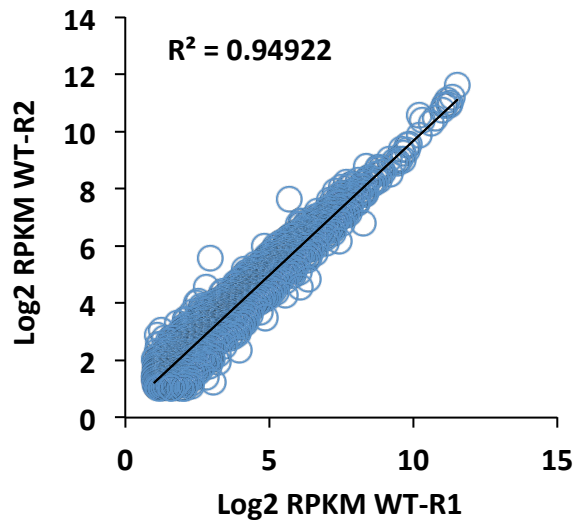**B**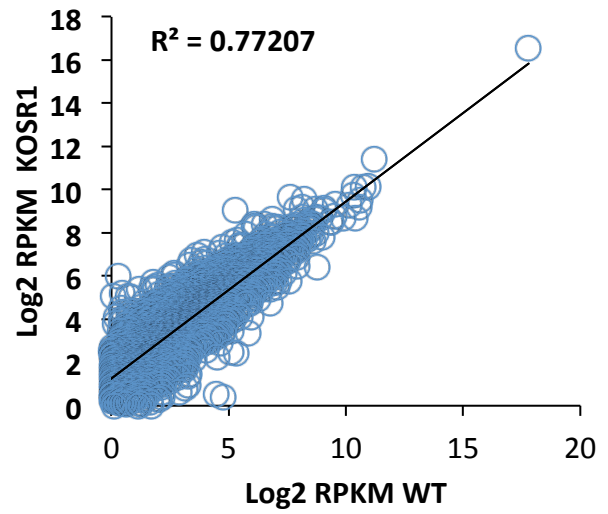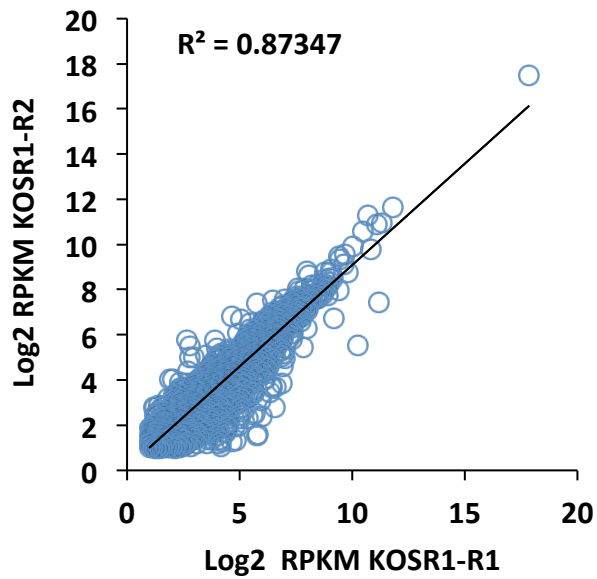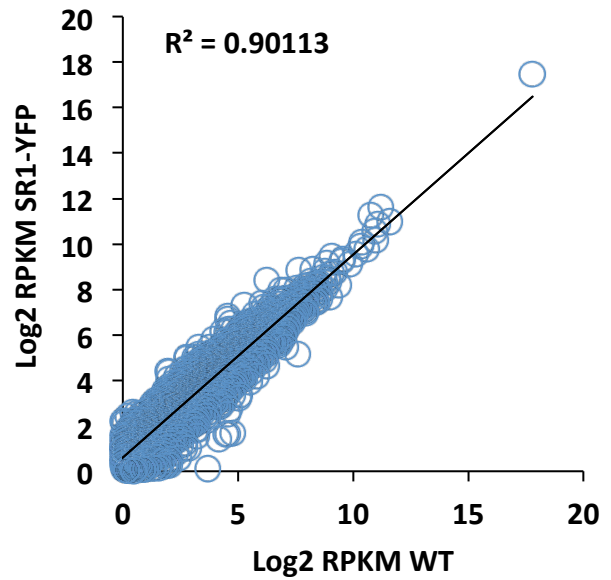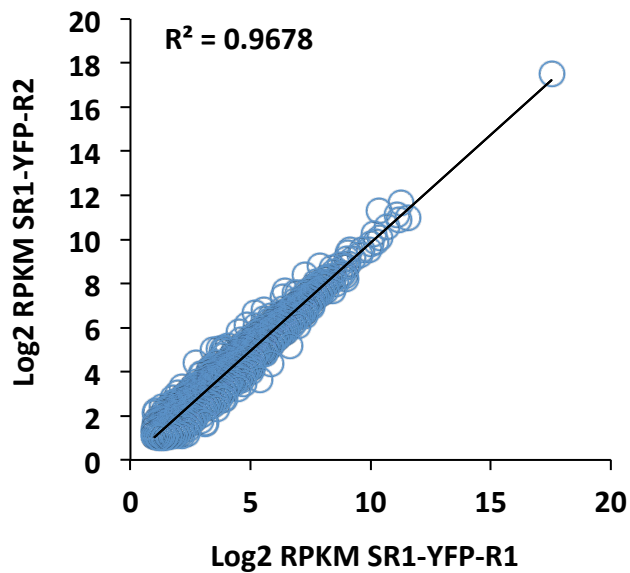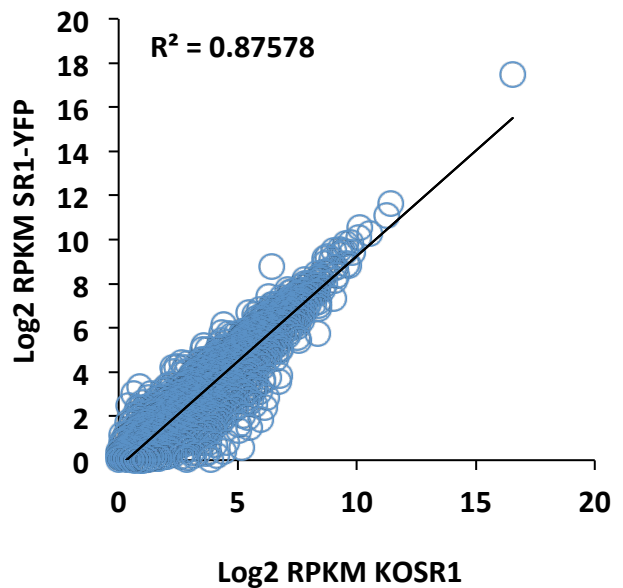

**Supplementary Figure S2. Scatter plot of RPKM values between replicates or genotypes.** The Log<sub>2</sub> transformed values of replicates of wild type, *sr1-1* and SR1-YFP (panel A) and between the genotypes of wild type, *sr1-1* and *SR1-YFP* (panel B) are plotted.



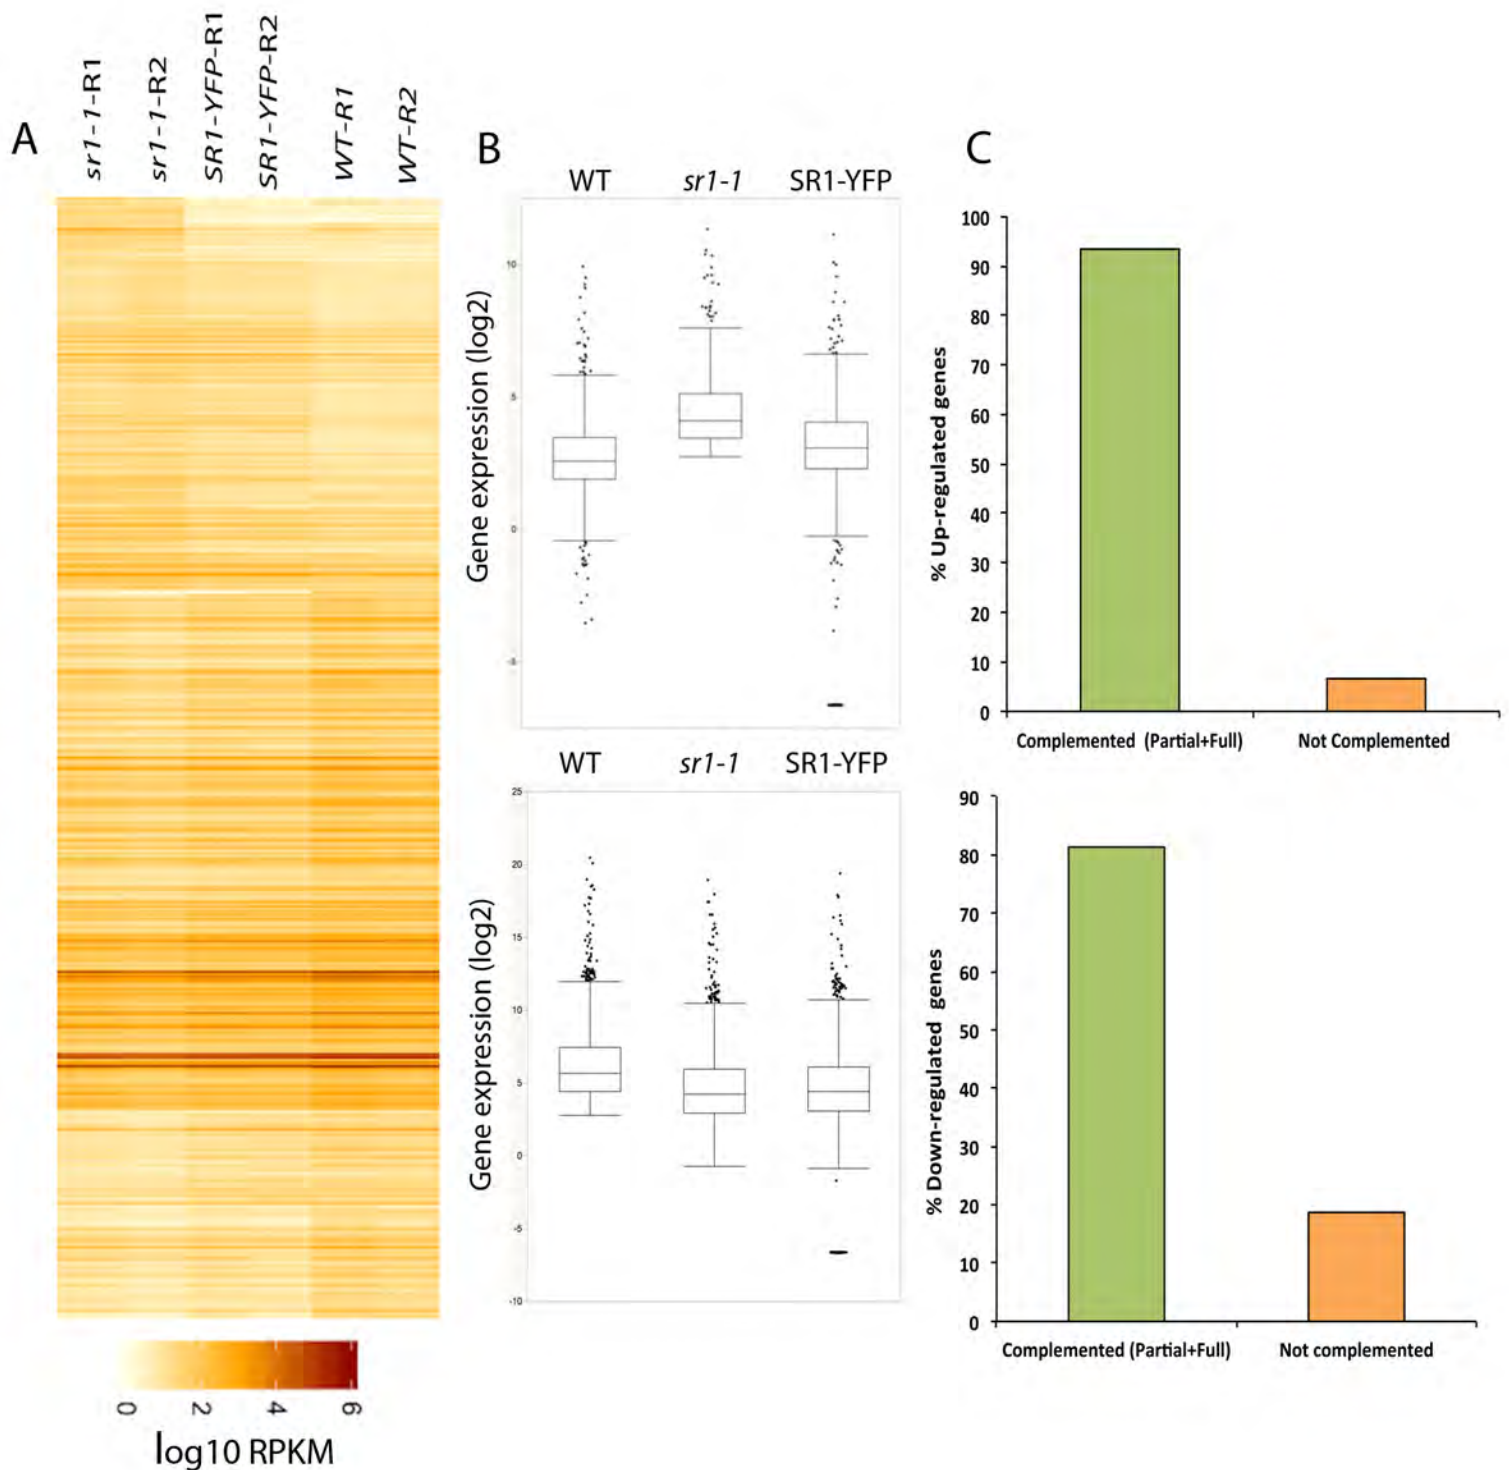

Suppl. Fig. S3

**Supplementary Figure S3. Differentially expressed genes in WT, *sr1-1* and SR1-YFP plants.**

**A)** Heatmap of DE genes in two biological replicates of WT, *sr1-1* and SR1-YFP plants. RPKM values were used to generate the heatmap with CummeRbund1. **B)** Box-and-whisker plots showing expression of up- (top panel) and down-regulated (bottom panel) DE genes in different genotypes. **C)** Percentage of up- (top panel) and down-regulated (bottom panel) DE genes that are either fully or partially complemented in SR1-YFP line.

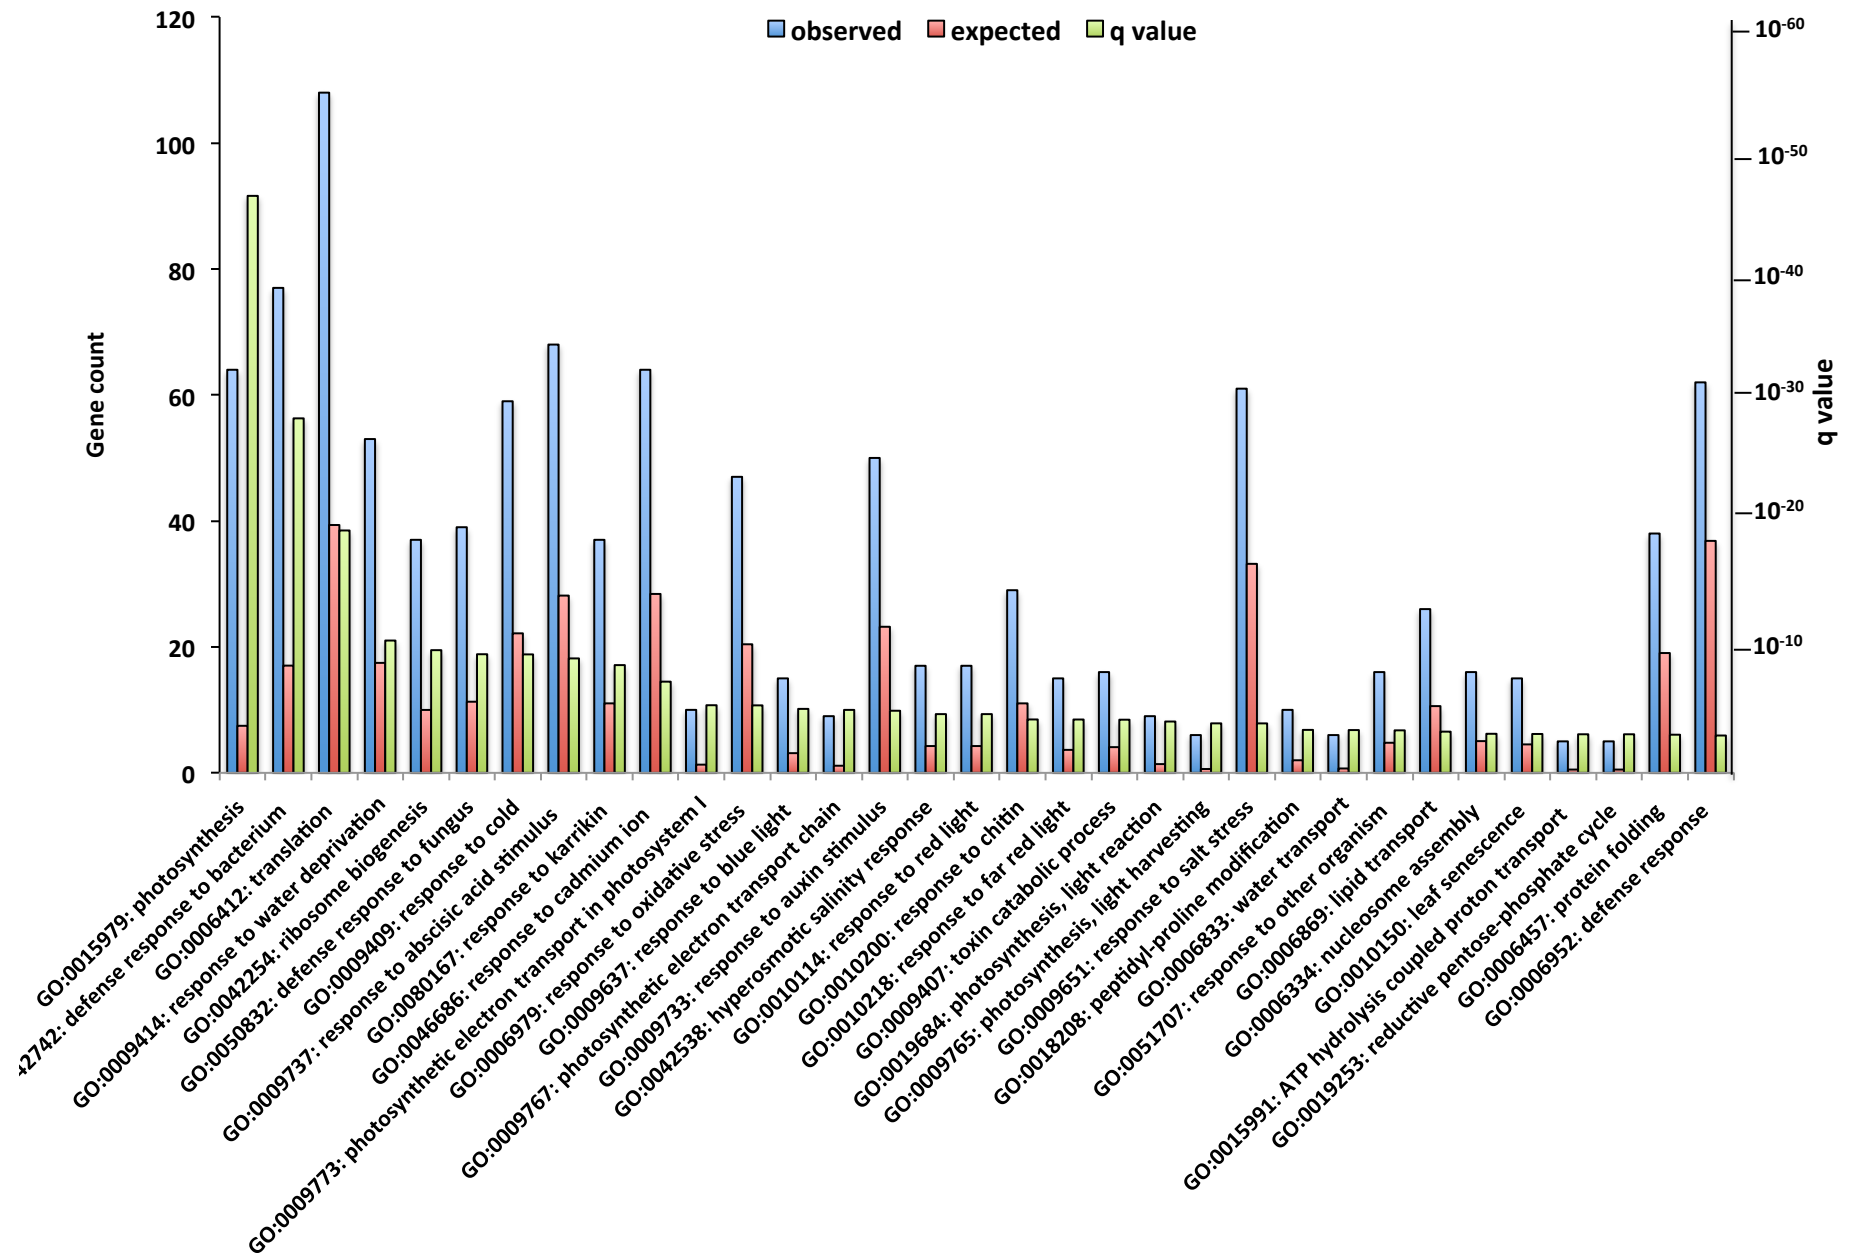

Suppl. Fig. S4A

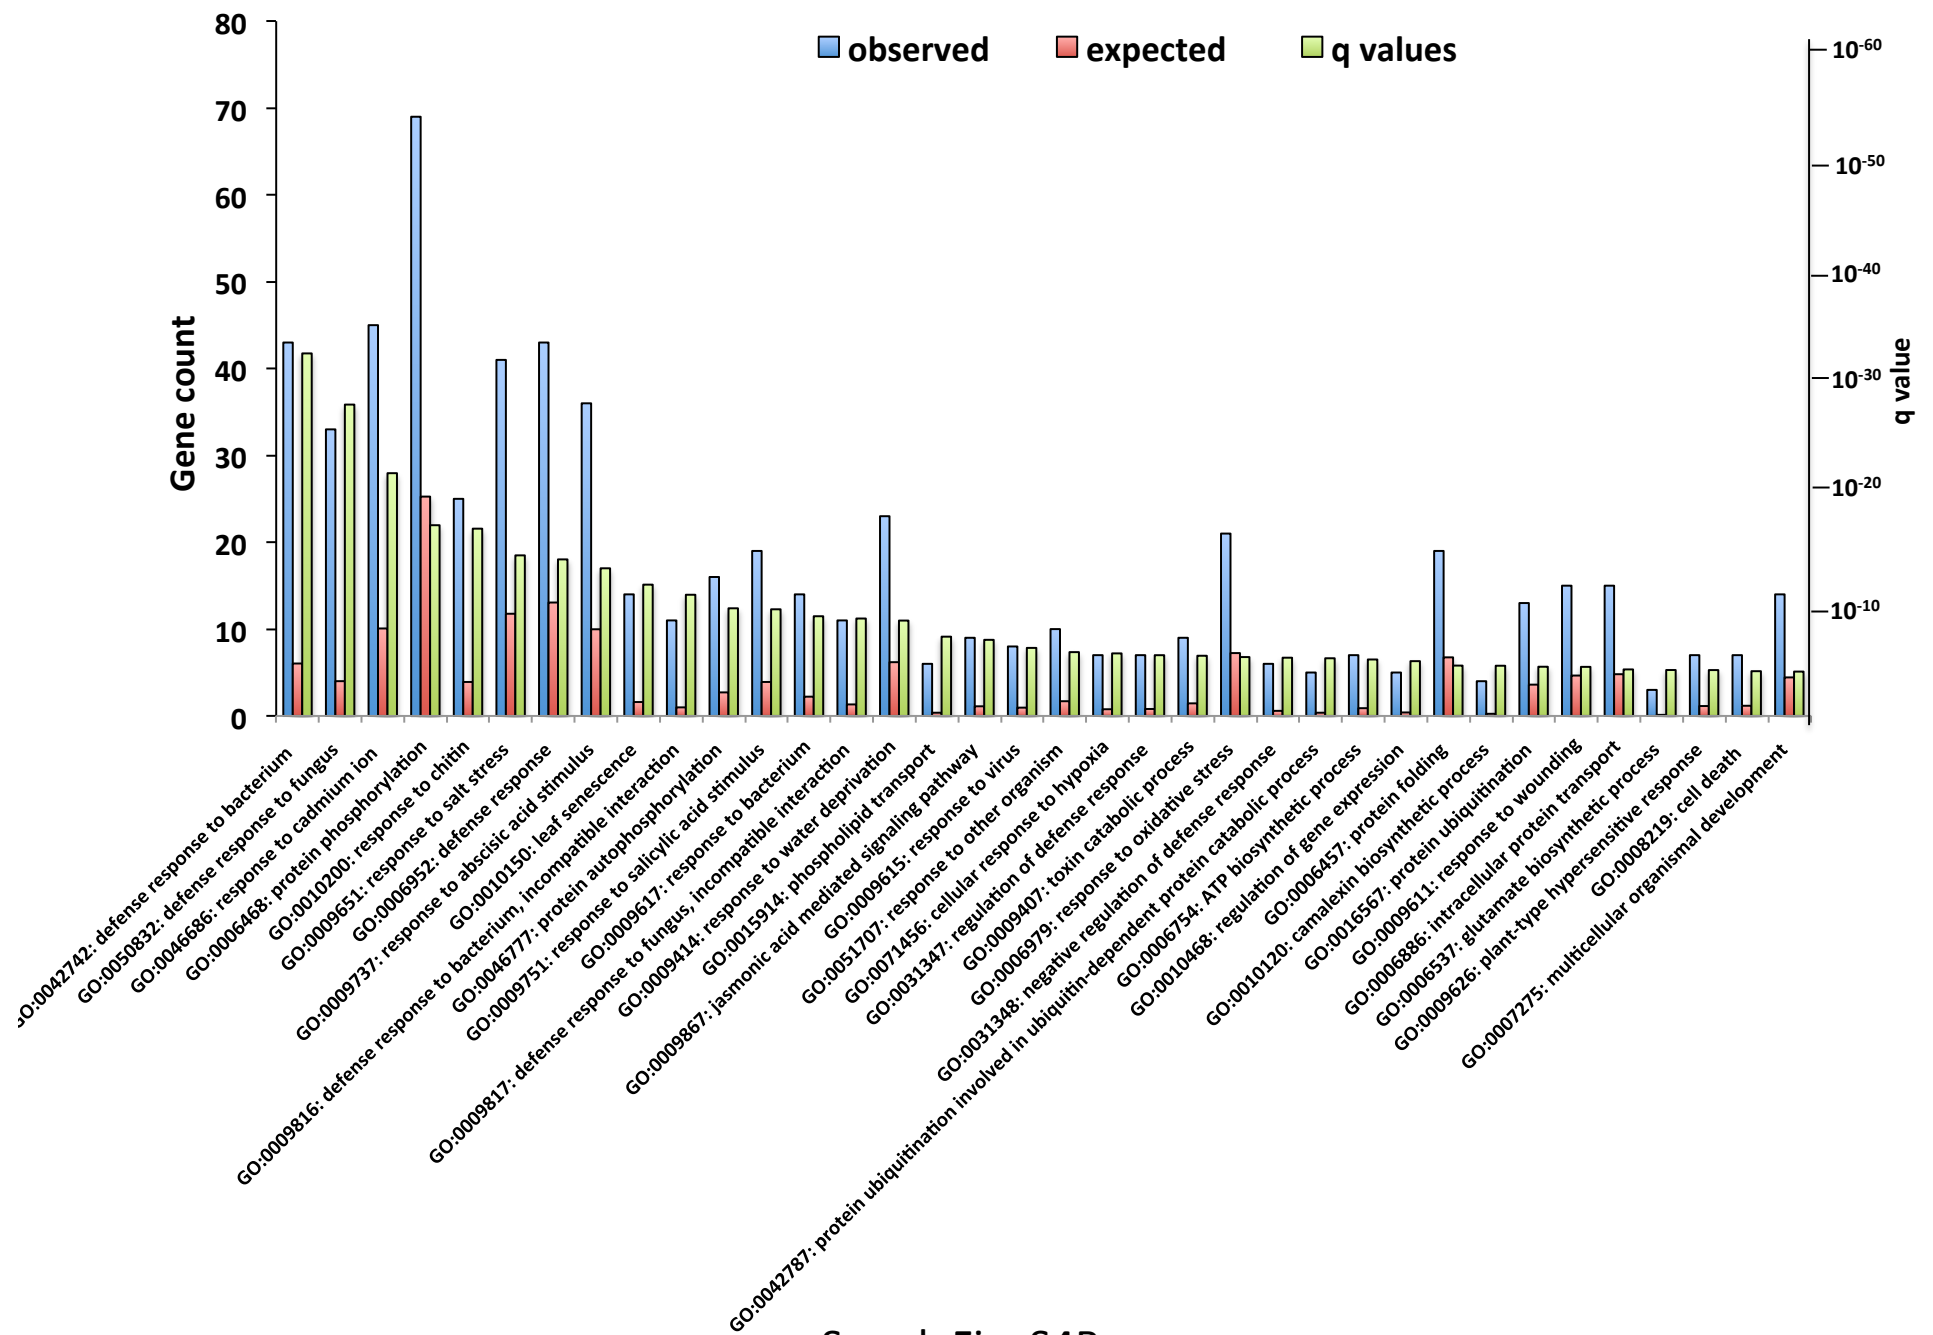

Suppl. Fig. S4B

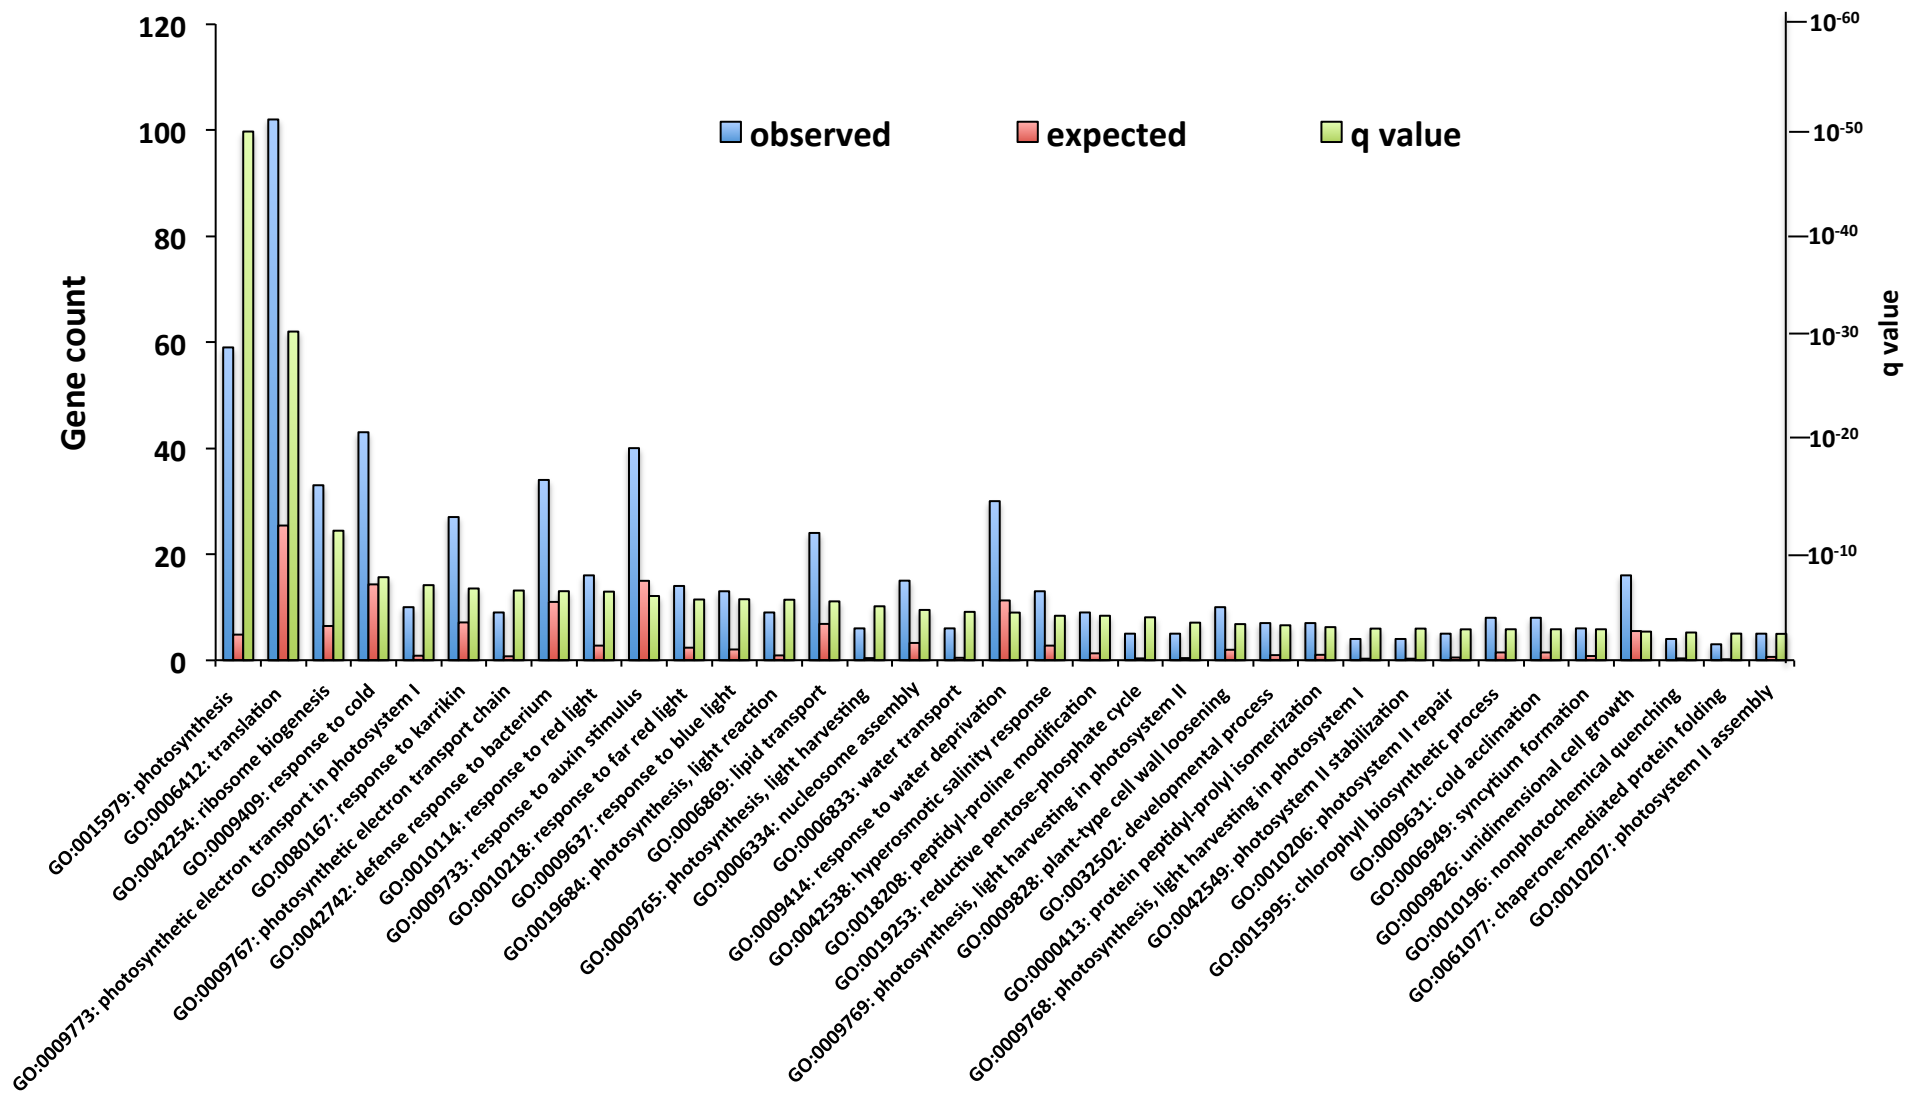

Suppl. Fig. S4C

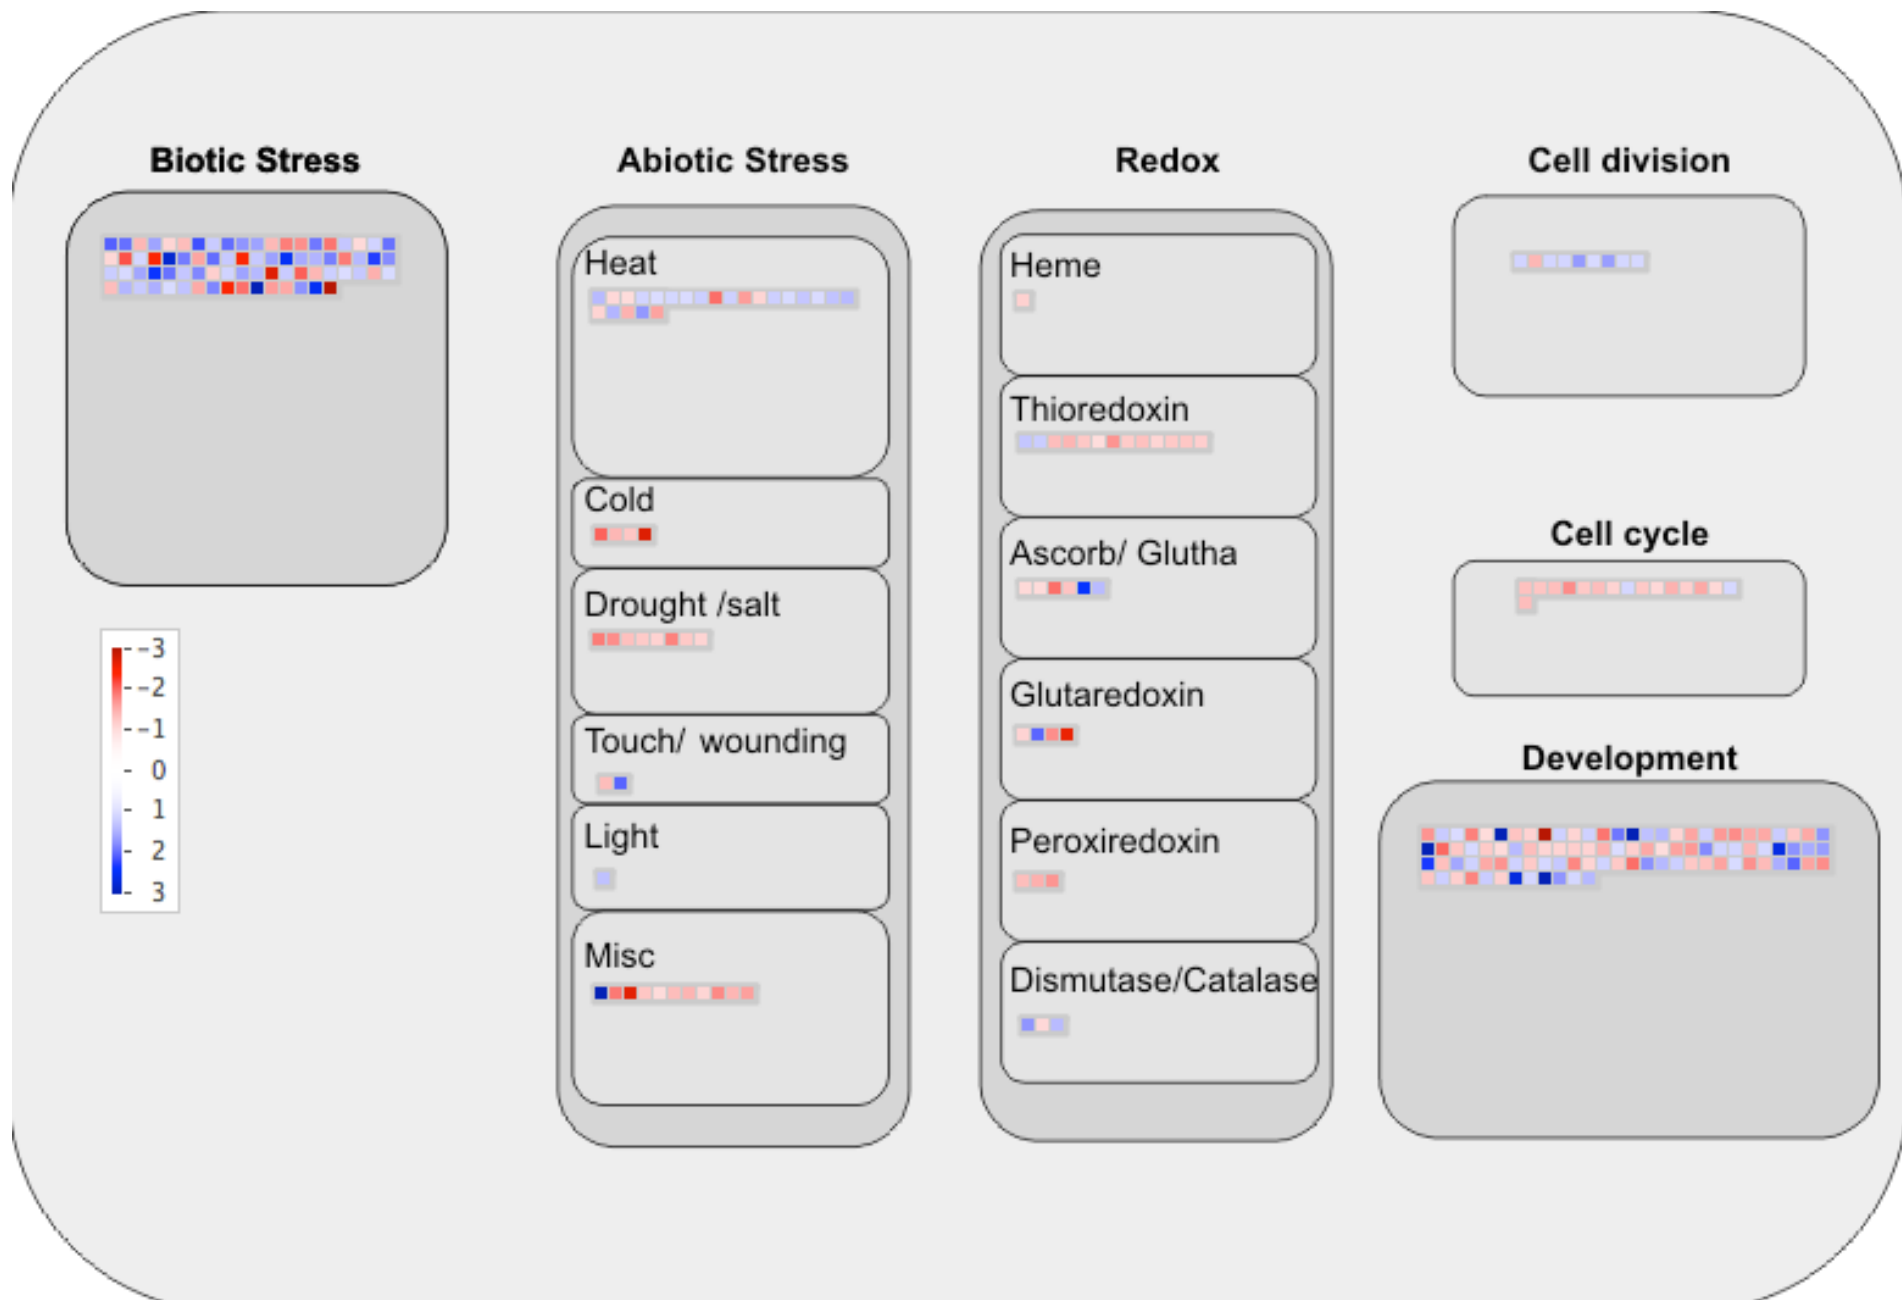

Suppl. Fig. S4D

**Supplementary Figure S4. GO term enrichment analysis.** GO term enrichment analysis for biological processes of **A)** all DE, **B)** up-regulated and **C)** down-regulated genes. For each GO term, the expected and observed gene numbers along with the statistical significance (q-value) for the enrichment is presented. Observed: Number of DE genes with a GO term for biological processes. Expected: Number of genes expected for each GO term in the whole genome. “Response to salt stress” GO term is indicated with an arrow. **D)** DE genes that are involved in “cellular response” categories were visualized using the MapMan software<sup>2</sup>. Red indicates decrease whereas blue indicates increase in expression of DE genes in the mutant.

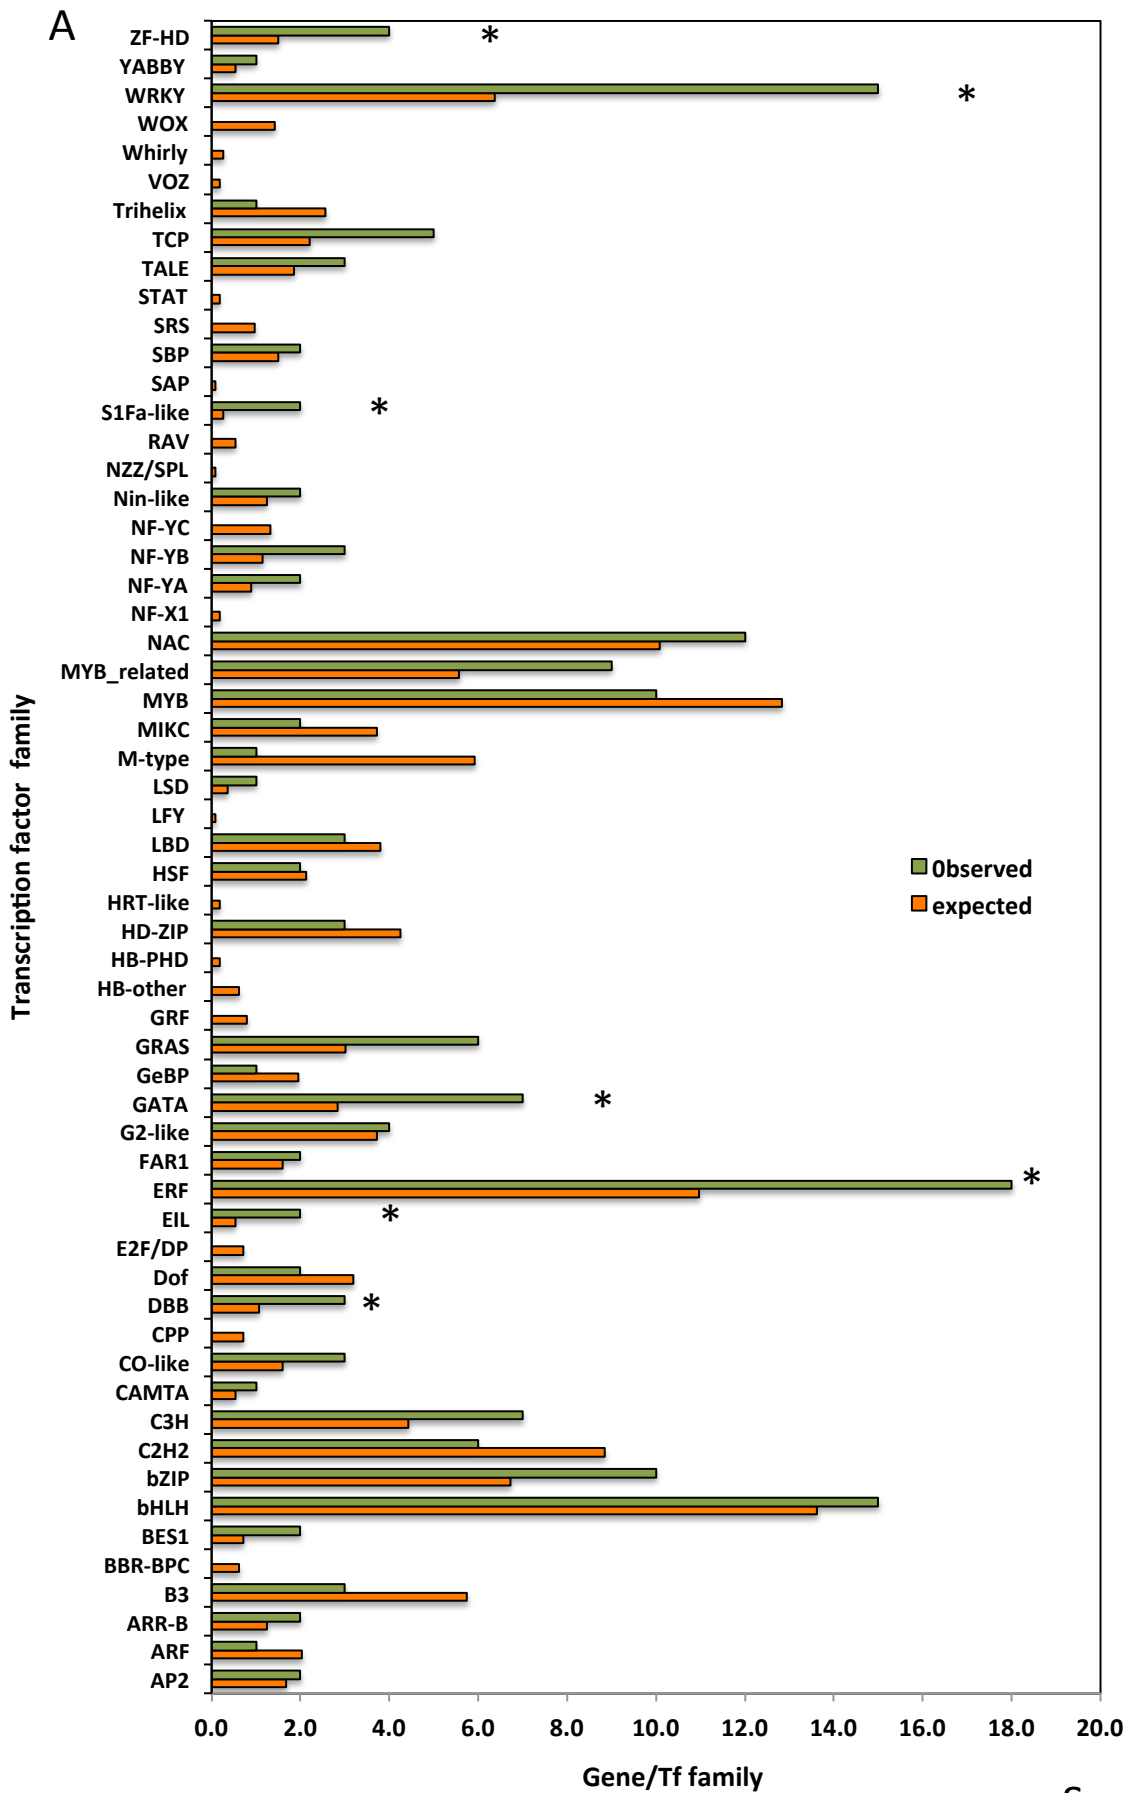

Suppl. Fig. S5A

B

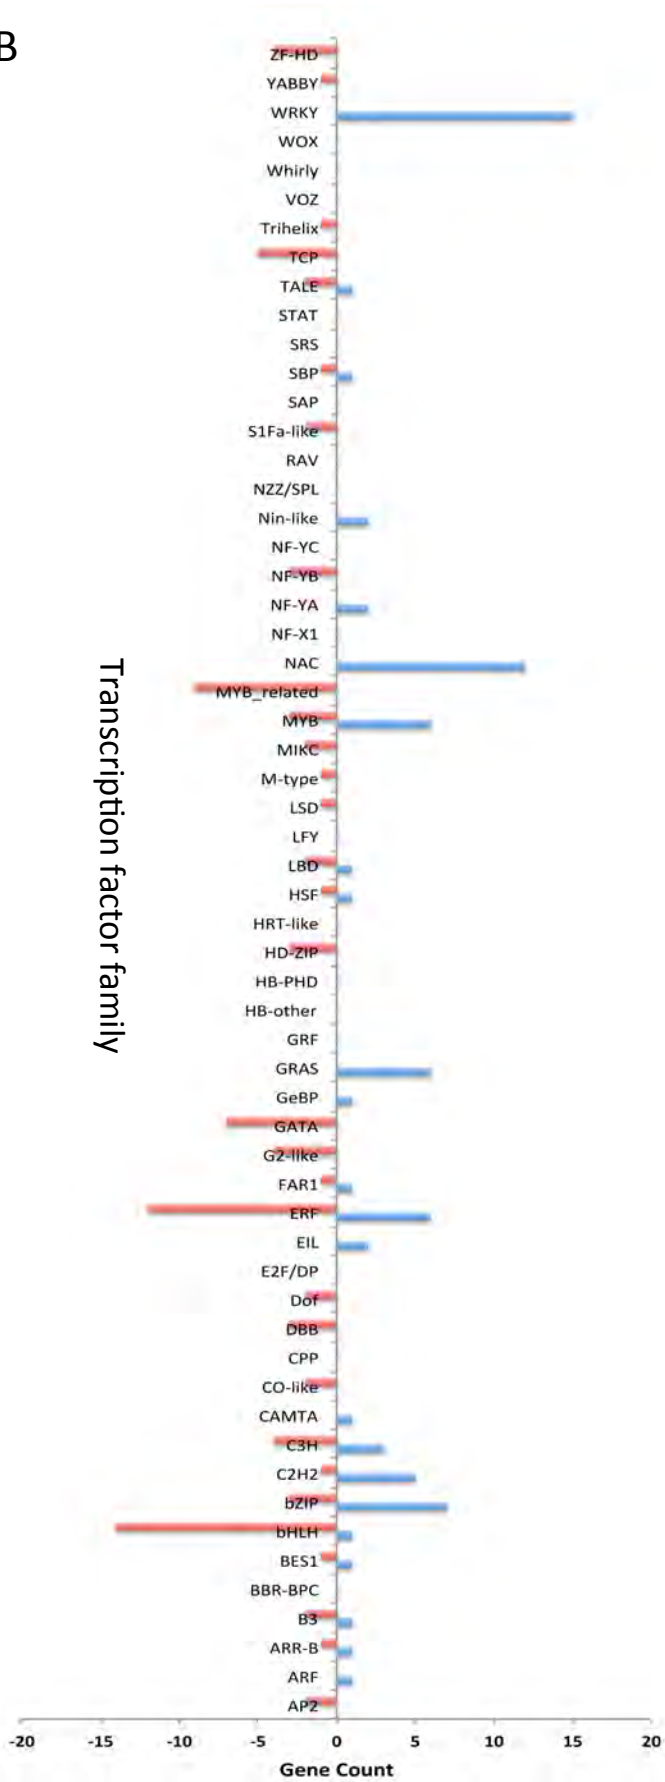

Suppl. Fig. S5B



**Supplementary Figure S5. TF gene families in DE genes** **A) Enrichment of TF families in all DE genes.** DE genes are enriched ( $P < 0.05$ ) for specific TF families, which are indicated with an asterisk. Observed: Number of genes associated with particular TF family in DE genes. Expected: Number of genes expected in each individual TF family in the genome. **B) Up- and down-regulated DE genes in each TF family.**

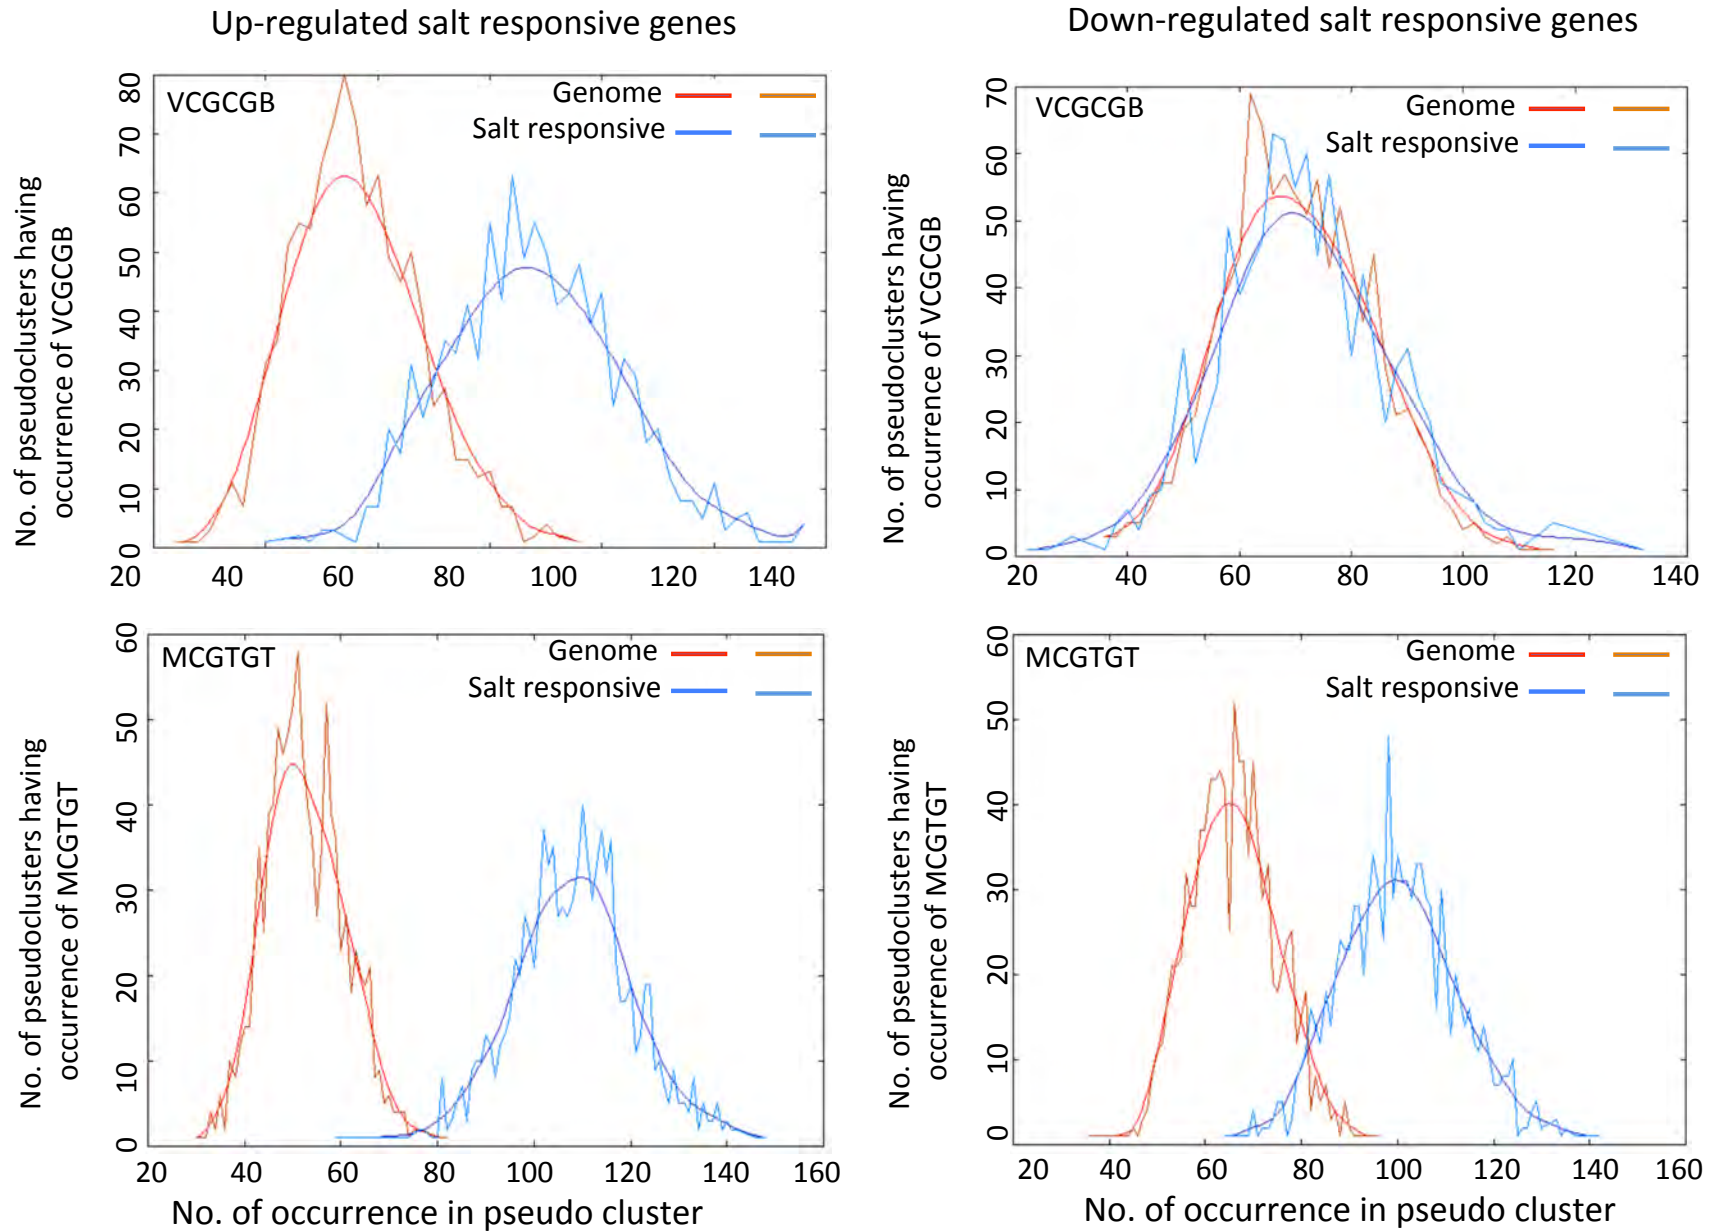

Suppl. Fig. S6A

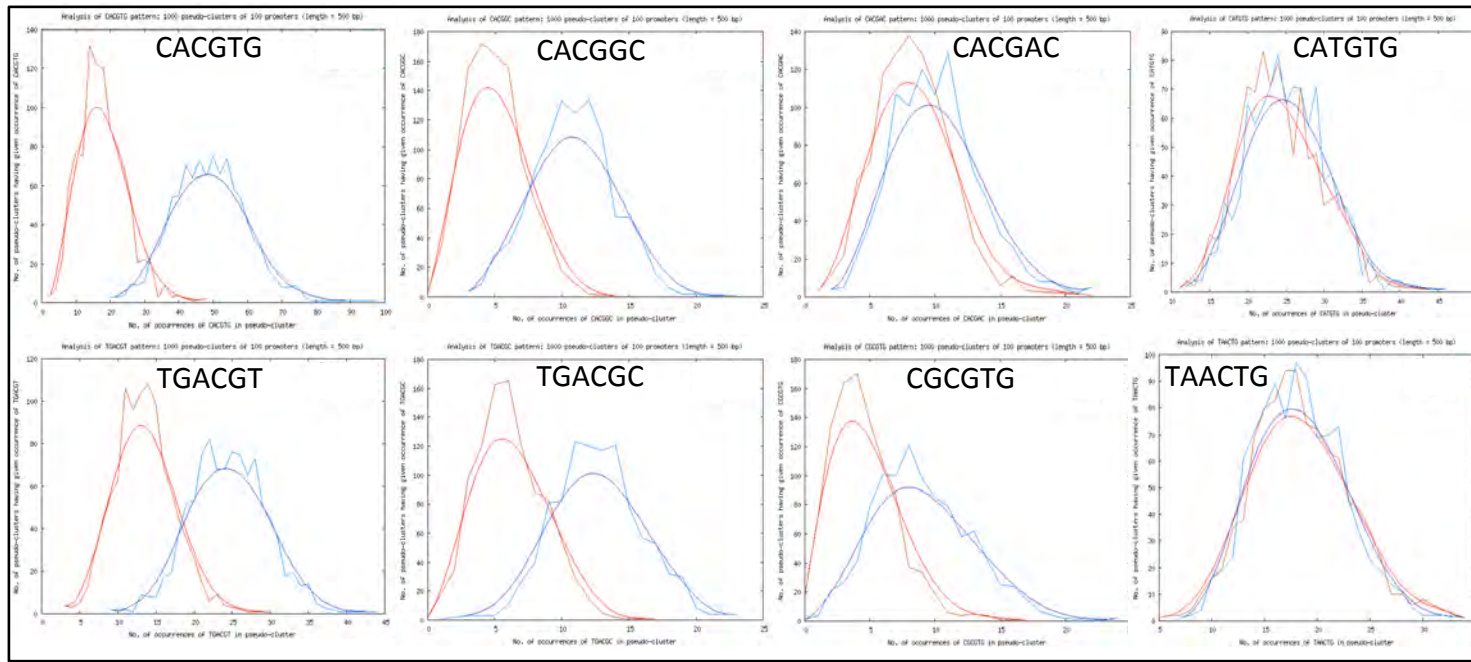

Salt, ABA and drought

ABA, drought and dehydration

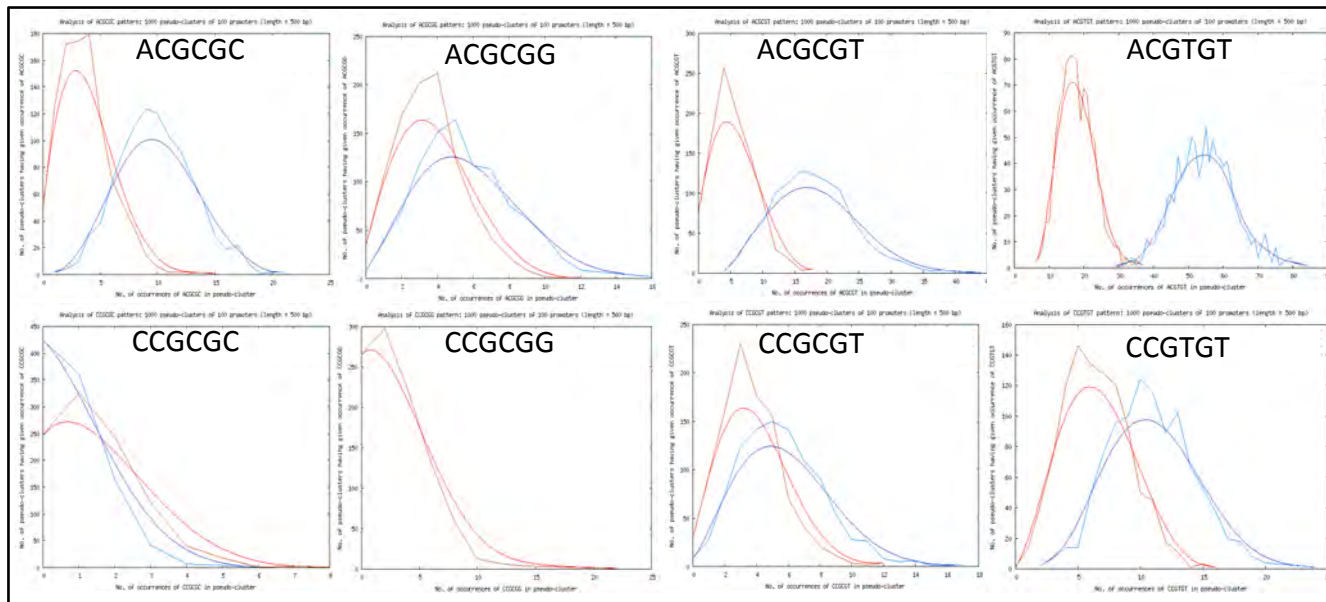

SR1 binding motifs

Genome ————  
 Salt responsive ————

Suppl. Fig. S6B

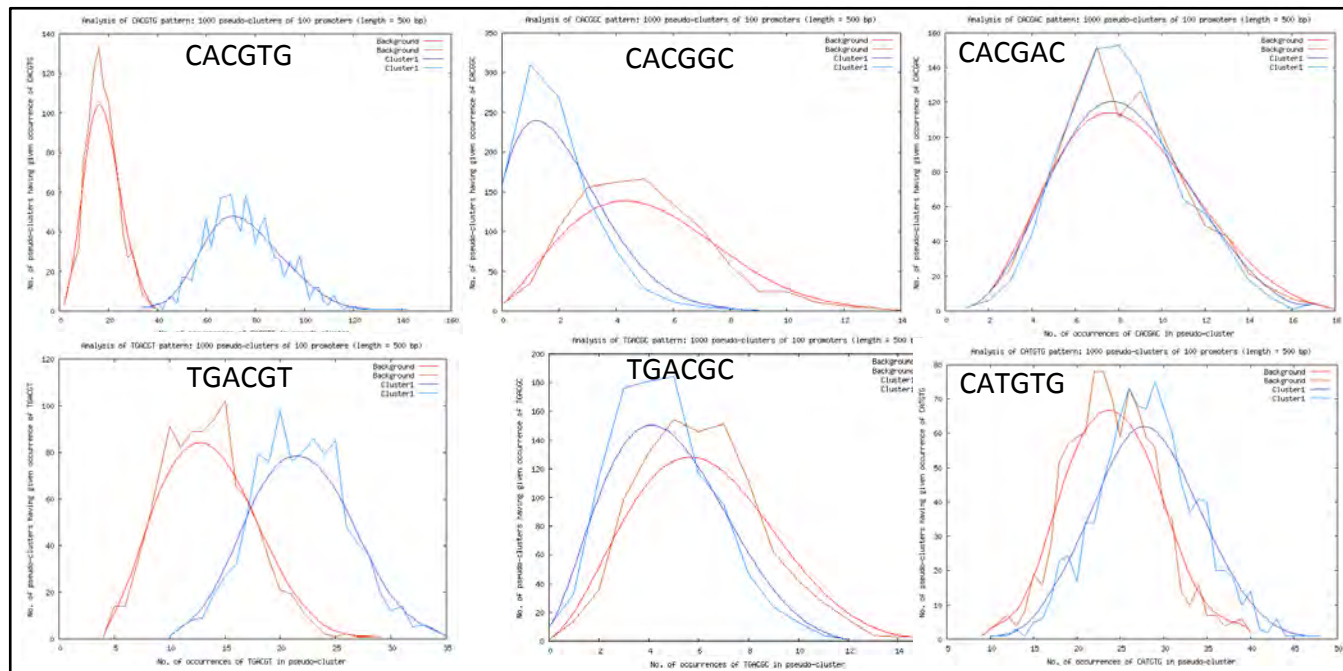

Salt, ABA and drought

ABA, drought and dehydration

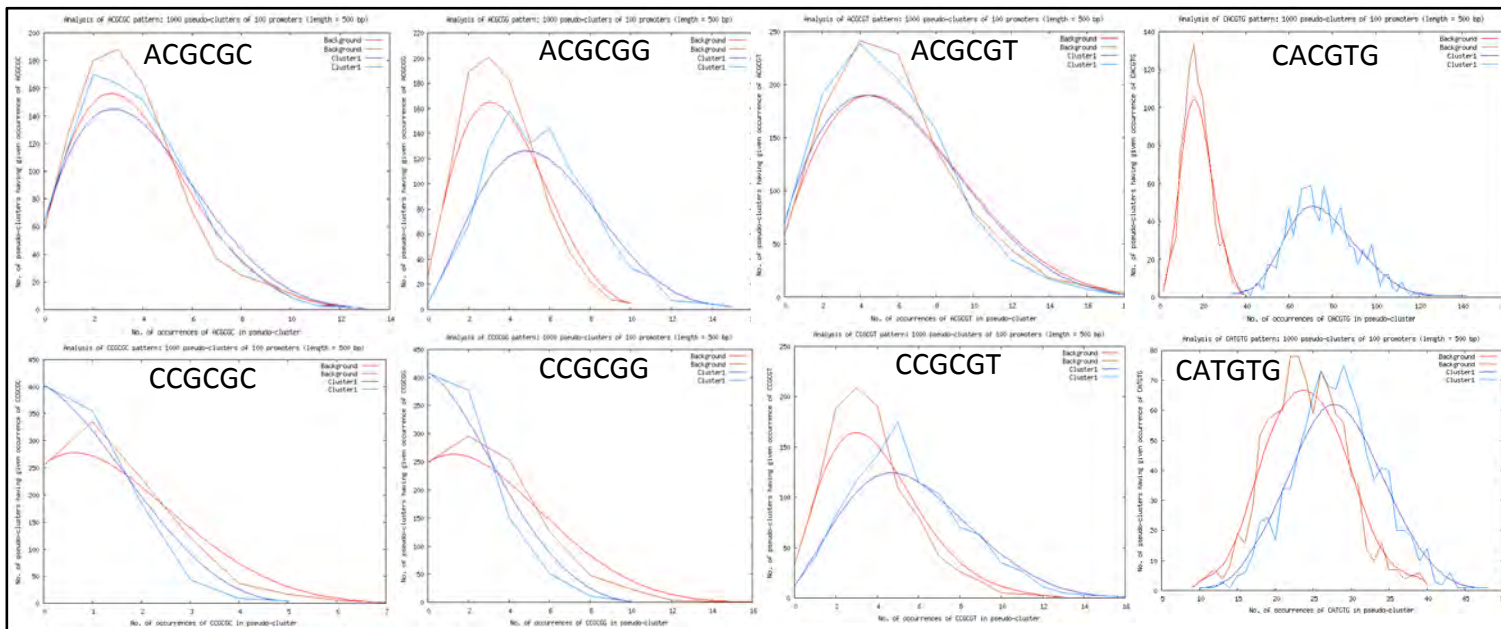

SR1 binding motifs

Genome ————  
Salt responsive ————

Suppl. Fig. S6C

**Supplementary Figure S6. Promoter analysis of differentially regulated salt-responsive genes.**

**A)** POBO analysis indicating the occurrence of the *RSRE* element (*VCGCGB*) and *MCGTGT* in the upstream (-1000 bp from TSS) of salt-responsive DE genes. Data pertaining to 114 up-regulated and 144 down-regulated genes were plotted. A significant (two tailed  $P < 0.0001$ ) enrichment of *VCGCGB* motif was found only in the promoter regions of up-regulated genes

**B)** POBO analysis calculating the occurrence of salt-specific *cis*-elements in the upstream (500 bp of TSS) of salt-responsive 114 up-regulated genes (Top panel). Occurrence of SR1 binding motifs was also plotted (Bottom panel). A significant (two tailed  $P < 0.0001$ ) enrichment of *CACGTG* (*G-Box*) and *CACGGC* (*N-box*) motifs was observed in the promoter regions of up-regulated genes.

**C)** POBO analysis calculating the occurrence of salt specific *cis*-elements in the upstream (500 bp of TSS) of salt-responsive down-regulated genes (Top panel). Occurrence *SRI* recognition motifs was also plotted (Bottom panel). Data pertaining to 144 down-regulated genes were plotted. A significant (two tailed  $P < 0.0001$ ) enrichment of only *CACGTG* (*G-Box*) motif was found in the promoter regions of down-regulated genes.

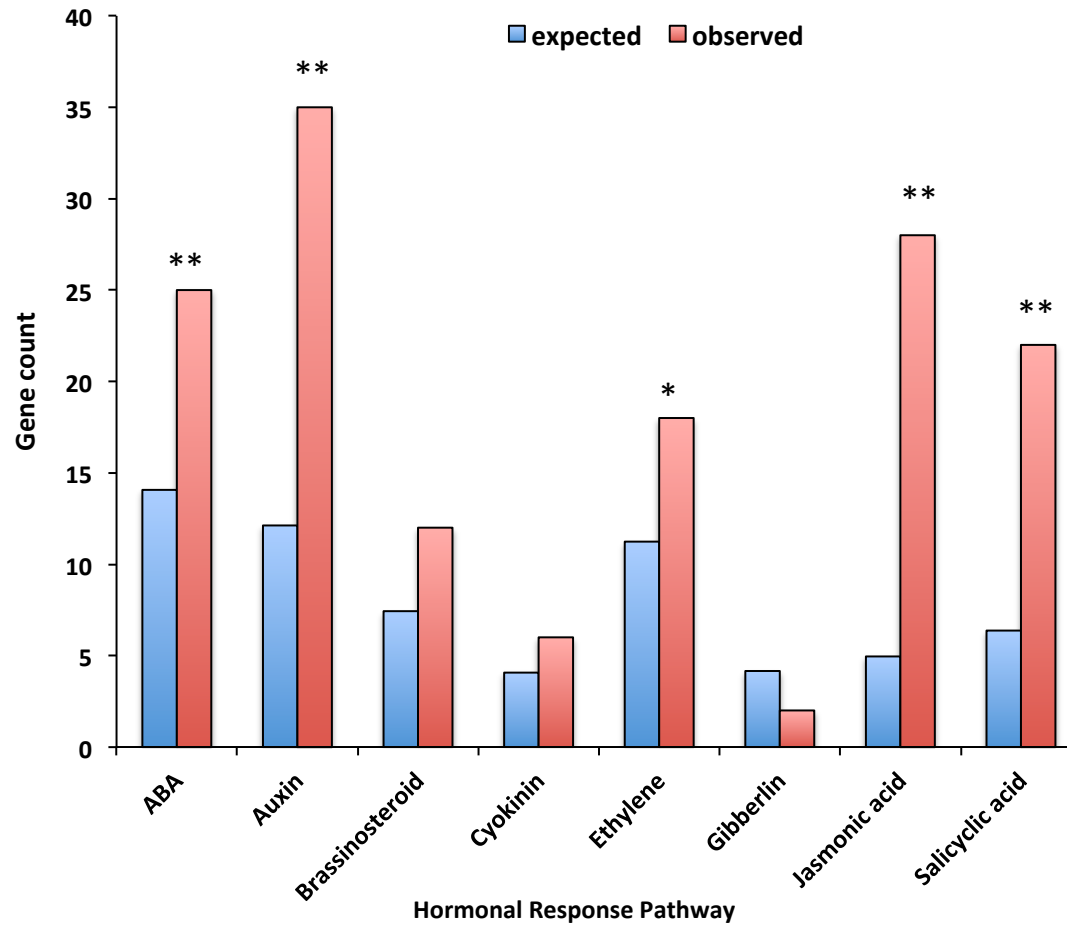

Suppl. Fig. S7

**Supplementary Figure S7. Enrichment of phytohormone-response pathways in DE genes.** DE genes were enriched for various phytohormone-response pathways. Observed: Number of genes associated with each individual hormonal pathway. Expected: Number of genes expected to associate with each individual hormonal pathway in the whole genome. Asterisks above each bar represent significance level (\*\* for  $P < 0.0001$  and \*  $P < 0.05$ ).

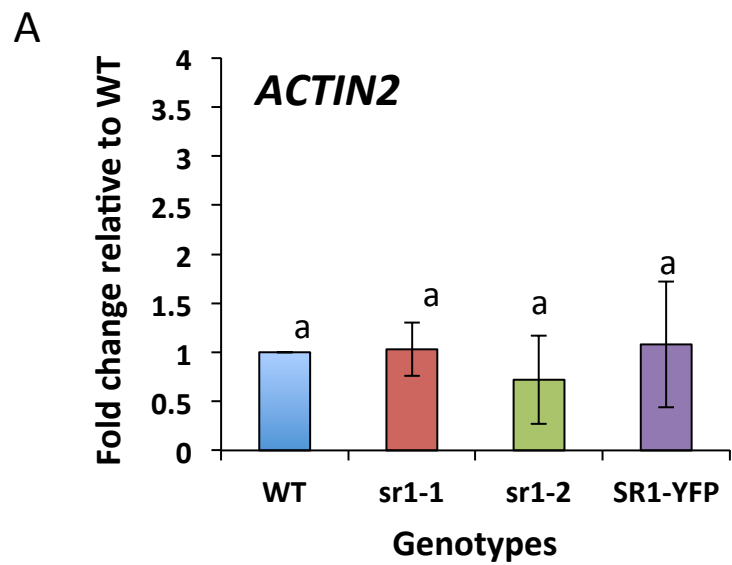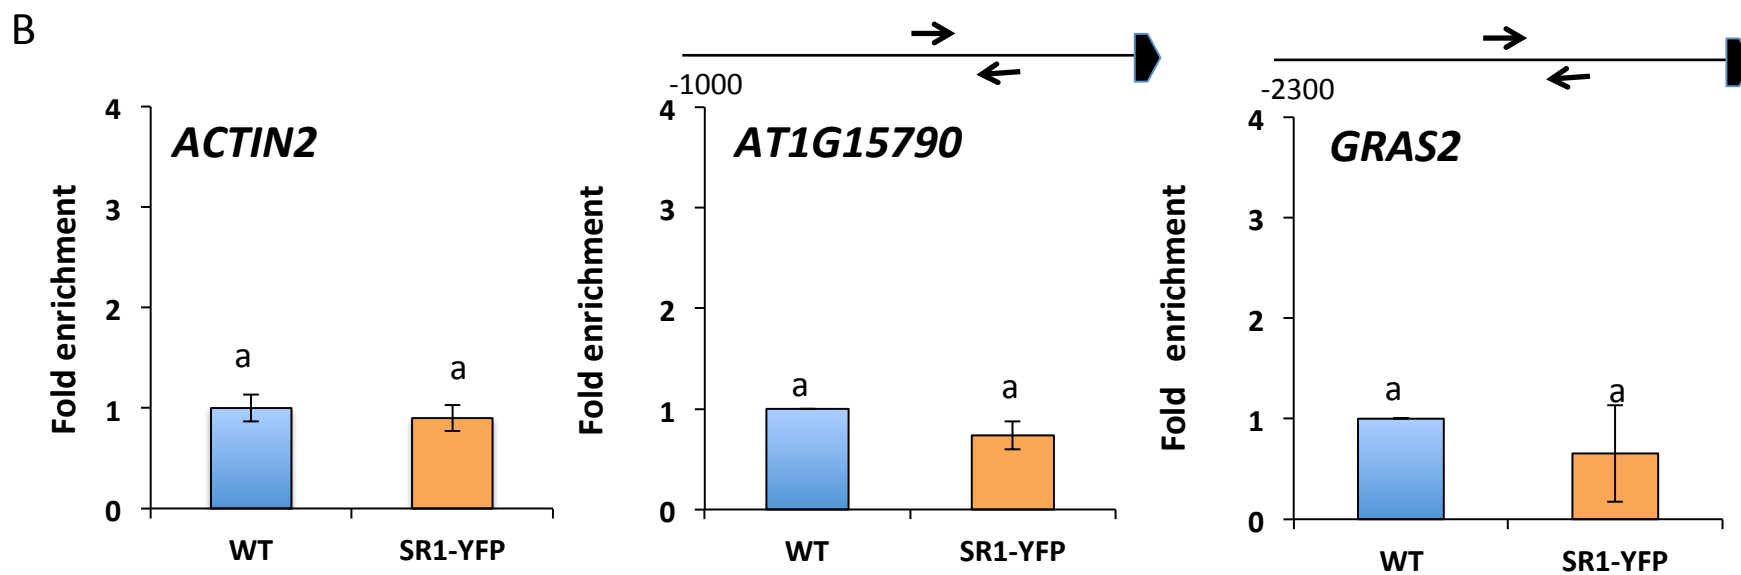

Suppl. Fig. S8

**Supplementary Figure S8. A)** Expression of *ACTIN2* in all genotypes. **B)** ChIP-PCR of *ACTIN2* and two other genes that do not contain SR1 binding motifs in their promoters. Chromatin from 15-day-old seedlings from WT and SR1-YFP was immunoprecipitated with anti-GFP antibody and used in PCR. The results obtained from four independent ChIP experiments were used to calculate fold enrichment. In case of *ACTIN2* that data were normalized to DNA input levels. In case of *Atlg15790* and *GRAS2* promoters, the data were normalized with DNA input and *ACTIN2*. The values of WT were considered as 1. Student t-test was performed and significant differences ( $P < 0.05$ ) among samples are labeled with different letters. Schematic diagram over the panel shows the location of primers (indicated by arrows) used in ChIP-PCR. Bold arrowhead indicates TSS.

- 1 Trapnell, C. *et al.* Differential gene and transcript expression analysis of RNA-seq experiments with TopHat and Cufflinks. *Nature protocols* **7**, 562-578 (2012).
- 2 Usadel, B. *et al.* A guide to using MapMan to visualize and compare Omics data in plants: a case study in the crop species, Maize. *Plant Cell and Environment* **32**, 1211-1229, doi:10.1111/j.1365-3040.2009.01978.x (2009).
